# Supplementary material for: Is individual smoking behaviour influenced by area-level ethnic density? A cross-sectional electronic health database study of inner south-east London
Source: PubMed Central journal article supplement — ERJ Open Res. 2017 Mar 22;3(1):00130-2016. doi: 10.1183/23120541.00130-2016 (PMC5395292; doi:10.1183/23120541.00130-2016), 2017-03-22
Supplement: 00130-2016_Supplement.pdf [file 00130-2016_Supplement.pdf]

## Supplementary files

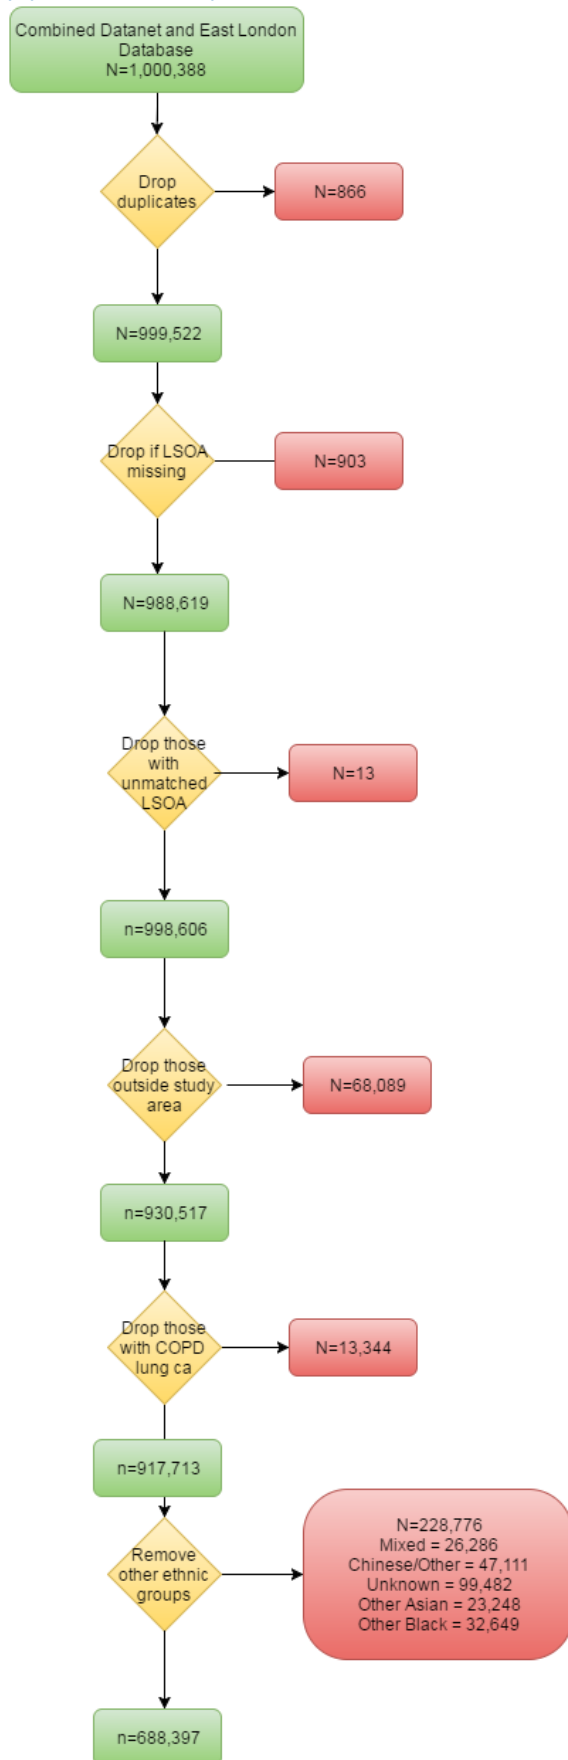

Supplementary Figure S1: Population Flowchart

Supplementary Table S1. Effect of a 10% in area ethnic density on being a heavy smoker stratified by age group for men

| Ethnic Group          | Male <=35 |             |        | Male >35 |             |        |
|-----------------------|-----------|-------------|--------|----------|-------------|--------|
|                       | OR        | 95% CI      | p. val | OR       | 95%         | p. val |
| white British & Irish | 1.01      | (0.89-1.14) | 0.100  | 1.00     | (0.95-1.04) | 0.889  |
| other white           | 0.79      | (0.92-1.01) | 0.056  | 0.94     | (0.82-1.08) | 0.373  |
| Indian                | 0.85      | (0.57-1.26) | 0.429  | 0.84     | (0.68-1.03) | 0.096  |
| Pakistani             | 0.10      | (0.65-1.53) | 0.992  | 1.11     | (0.82-1.51) | 0.492  |
| Bangladeshi           | 0.87      | (0.78-0.96) | 0.009  | 0.90     | (0.52-0.98) | 0.018  |
| African               | 1.03      | (0.44-2.40) | 0.949  | 0.92     | (0.65-1.31) | 0.655  |
| Caribbean             | 0.78      | (0.22-2.80) | 0.706  | 0.68     | (0.40-1.16) | 0.155  |

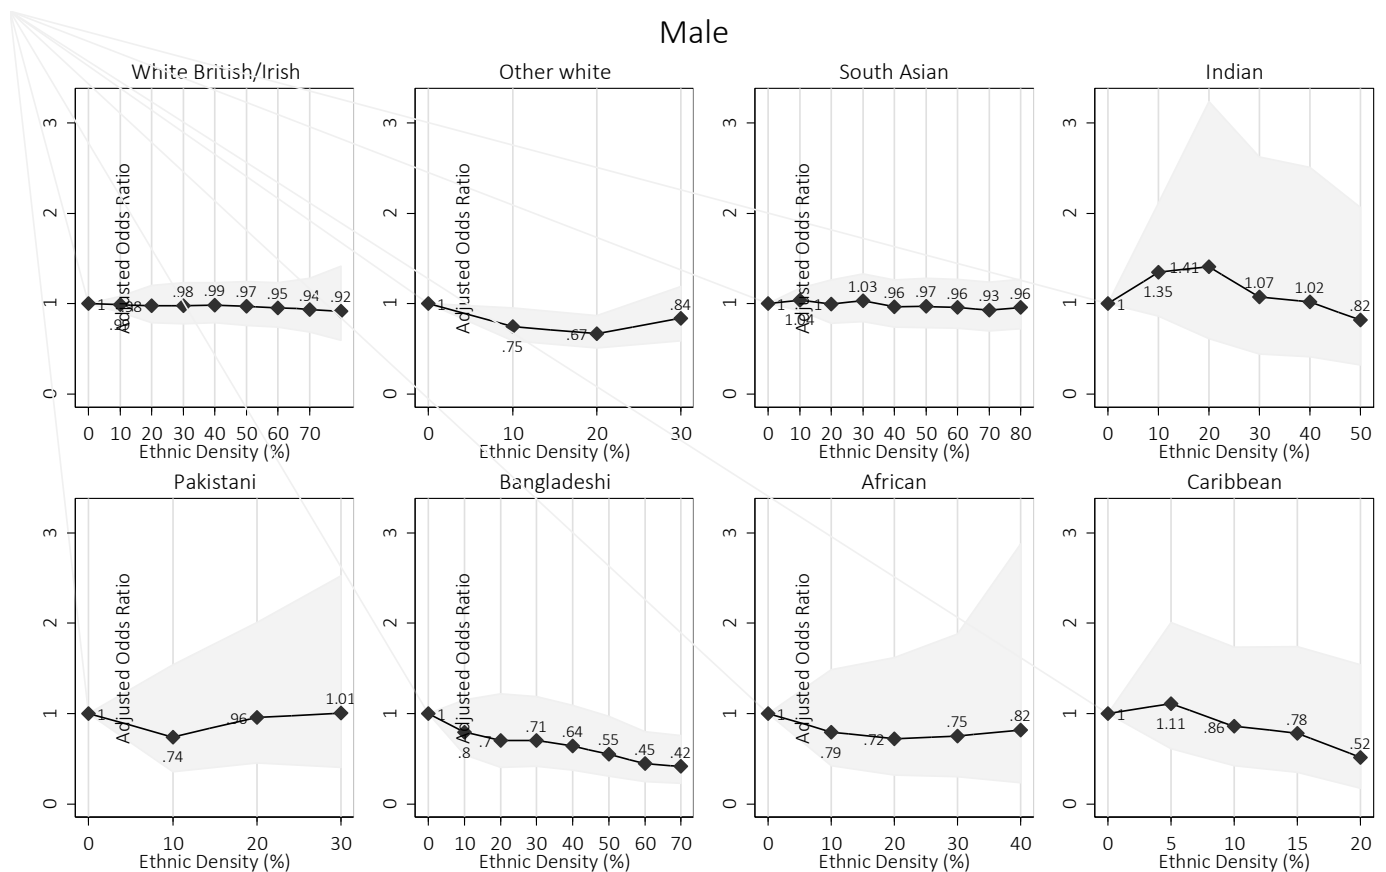

Supplementary Figure S2. Non-linear relationship between own-group ethnic density and the odds of being a high intensity smoker, by ethnic group for males only.

Supplementary Table S2. Read codes for smoking status

| <b>Read clinical term</b>        | <b>Category</b> | <b>Read clinical code</b> |
|----------------------------------|-----------------|---------------------------|
| Exposed to tobacco smoke at home | Unknown         | 137I0                     |
| Total time smoked                | Unknown         | 137n                      |
| Refusal to give smoking status   | Unknown         | 137k                      |
| Tobacco consumption unknown      | Unknown         | 137E                      |
| Current non-smoker               | Unknown         | 137L                      |
| Passive smoker                   | Unknown         | 137I                      |
| Cigarette pack-years             | Unknown         | 137g                      |
| Not a passive smoker             | Unknown         | 137U                      |
| Admitted tobacco cons untrue?    | Unknown         | 137D                      |
| Ex-tobacco chewer                | Unknown         | 137i                      |
| Waterpipe tobacco consumption    | Unknown         | 137o                      |
| Chews tobacco                    | Unknown         | 137W                      |
| Very heavy smoker - 40+cigs/d    | Current Smoker  | 1376                      |
| Thinking about stop smoking      | Current Smoker  | 137c                      |
| Tobacco consumption              | Current Smoker  | 137                       |
| Smoking started                  | Current Smoker  | 137Q                      |
| Rolls own cigarettes             | Current Smoker  | 137M                      |
| Smoking reduced                  | Current Smoker  | 137V                      |
| Cigar consumption                | Current Smoker  | 137Y                      |
| Reason for restarting smoking    | Current Smoker  | 137f                      |
| Cigarette smoker                 | Current Smoker  | 137P                      |
| Cigar smoker                     | Current Smoker  | 137J                      |
| Tobacco consumption NOS          | Current Smoker  | 137Z                      |
| Trying to give up smoking        | Current Smoker  | 137G                      |
| Light smoker - 1-9 cigs/day      | Current Smoker  | 1373                      |
| Heavy smoker - 20-39 cigs/day    | Current Smoker  | 1375                      |
| Min from wake to 1st tobac con   | Current Smoker  | 137h                      |
| Smoking restarted                | Current Smoker  | 137e                      |
| Not interested in stop smoking   | Current Smoker  | 137d                      |
| Pipe tobacco consumption         | Current Smoker  | 137a                      |
| Current smoker                   | Current Smoker  | 137R                      |
| Ready to stop smoking            | Current Smoker  | 137b                      |
| Pipe smoker                      | Current Smoker  | 137H                      |
| Trivial smoker - < 1 cig/day     | Current Smoker  | 1372                      |
| Failed attempt to stop smoking   | Current Smoker  | 137m                      |
| Keeps trying to stop smoking     | Current Smoker  | 137C                      |
| Cigarette consumption            | Current Smoker  | 137X                      |
| Moderate smoker - 10-19 cigs/d   | Current Smoker  | 1374                      |
| Ex-heavy smoker (20-39/day)      | Ex-smoker       | 137A                      |
| Date ceased smoking              | Ex-smoker       | 137T                      |
| Ex-smoker                        | Ex-smoker       | 137S                      |
| Stopped smoking                  | Ex-smoker       | 137K                      |
| Ex cigar smoker                  | Ex-smoker       | 137O                      |

|                                |              |       |
|--------------------------------|--------------|-------|
| Ex-trivial smoker (<1/day)     | Ex-smoker    | 1377  |
| Ex-smoker - amount unknown     | Ex-smoker    | 137F  |
| Ex-moderate smoker (10-19/day) | Ex-smoker    | 1379  |
| Ex-very heavy smoker (40+/day) | Ex-smoker    | 137B  |
| Ex roll-up cigarette smoker    | Ex-smoker    | 137I  |
| Recently stopped smoking       | Ex-smoker    | 137K0 |
| Ex-light smoker (1-9/day)      | Ex-smoker    | 1378  |
| Ex pipe smoker                 | Ex-smoker    | 137N  |
| Ex-cigarette smoker            | Ex-smoker    | 137j  |
| Never smoked tobacco           | Never Smoked | 1371  |

Supplementary Table S3. Read codes for COPD and lung cancer

| Read clinical term              | Read clinical code |
|---------------------------------|--------------------|
| <b>COPD</b>                     |                    |
| Chronic obstr.airway dis.NOS    | H3z..              |
| Other emphysema NOS             | H32yz              |
| Other chronic bronchitis        | H31y.              |
| Giant bullous emphysema         | H3202              |
| Emphysematous bronchitis        | H3121              |
| Chronic obstr.airway dis.OS     | H3y..              |
| Chronic asthmatic bronchitis    | H3120              |
| Mild chron obstr pulm disease   | H36..              |
| Emphysema NOS                   | H32z.              |
| Chronic bronchitis              | H31..              |
| Centrilobular emphysema         | H322.              |
| MacLeod's unilateral emphysema  | H32y2              |
| Obstructive chr.bronchitis NOS  | H312z              |
| Obstructive chronic bronchitis  | H312.              |
| Chronic catarrhal bronchitis    | H3100              |
| Segmental bullous emphysema     | H3200              |
| Chronic bullous emphysema NOS   | H320z              |
| Chr obs pulm dis+ac exac,unspc  | H3y1.              |
| Emphysema                       | H32..              |
| Zonal bullous emphysema         | H3201              |
| Mucopurulent chr.bronchitis     | H311.              |
| Chronic bronchitis NOS          | H31z.              |
| Bullous emphysema + collapse    | H3203              |
| Very severe COPD                | H39..              |
| Chronic bullous emphysema       | H320.              |
| Sev chron obstr pulm disease    | H38..              |
| Simple chronic bronchitis       | H310.              |
| Other emphysema                 | H32y.              |
| Chr obs pulm dis+ac I resp inf  | H3y0.              |
| Mod chron obstr pulm disease    | H37..              |
| Chronic obstructive pulm.dis.   | H3...              |
| <b>Lung cancer</b>              |                    |
| Mesothelioma of pleura          | B232.              |
| 2-malig neop lung               | B570.              |
| Malig neop upper lobe of lung   | B2221              |
| Malig neop main bronchus        | B221.              |
| Malig neop upp lobe bronc/lung  | B222.              |
| Malig neop overlap resp/thc org | B26..              |
| Malig neop low lobe bronc/lung  | B224.              |
| Malig neop low lobe bronc/lung  | B224z              |
| Malig neop trachea/bronch/lung  | B22..              |
| Malig neop bronchus/lung NOS    | B22z.              |

|                                |       |
|--------------------------------|-------|
| Malig neop upper lobe bronchus | B2220 |
| Malig neop lower lobe of lung  | B2241 |
| Mesothelioma                   | B226. |

---
